# Supplementary material for: Noninvasive assessment of characteristics of novel anti-HER2 antibodies by molecular imaging in a human gastric cancer xenograft-bearing mouse model
Source: PubMed Central journal article supplement (PMC6137128; doi:10.1038/s41598-018-32094-x), 2018-09-13
Supplement: 41598_2018_32094_MOESM1_ESM.pdf [file 41598_2018_32094_MOESM1_ESM.pdf]

## Supplementary Information

### **Noninvasive assessment of characteristics of novel anti-HER2 antibodies by molecular imaging in a human gastric cancer xenograft-bearing mouse model**

Wei-Ying Kuo<sup>1</sup>, Jia-Jia Lin<sup>2</sup>, Hung-Ju Hsu<sup>1</sup>, Hong-Sen Chen<sup>1</sup>, \*An-Suei Yang<sup>1</sup>, and \*Chun-Yi Wu<sup>2,3</sup>

<sup>1</sup>Genomics Research Center, Academia Sinica, Taipei, Taiwan

<sup>2</sup>Department of Biomedical Imaging and Radiological Science, China Medical University, Taichung, Taiwan

<sup>3</sup>Master Program for Biomedical Engineering, China Medical University, Taichung, Taiwan

\* Correspondence should be addressed to: Chun-Yi Wu, Department of Biomedical Imaging and Radiological Science, China Medical University, Taichung, Taiwan 40402. Phone: +886-4-2205-3366 ext.7808. email: [cywu@mail.cmu.edu.tw](mailto:cywu@mail.cmu.edu.tw)

## Supplementary Figure

**a**

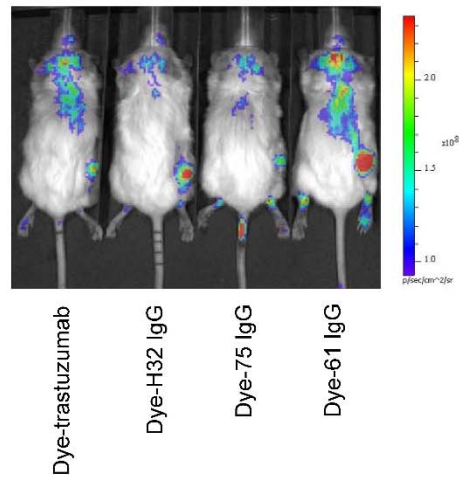

**b**

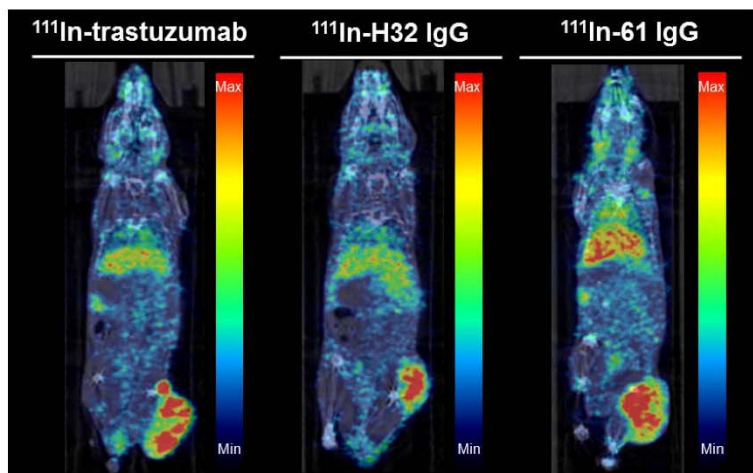

**Figure S1.** (a) *In vivo* NIRF imaging (b) MicroSPECT/CT imaging of BT474 xenograft-bearing mice injected with 18.5 MBq (0.1 mg/mouse) of [ $^{111}\text{In}$ ]labeled antibodies at 24 hr p.i..

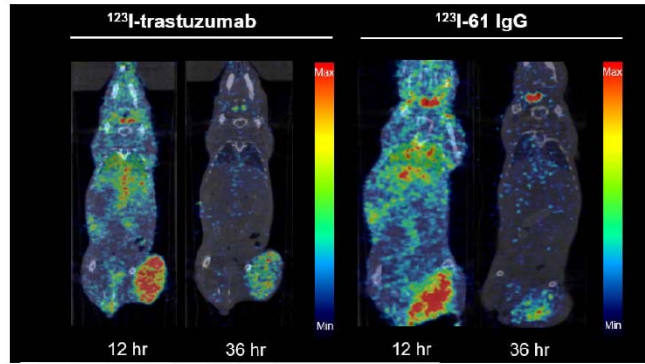

**Figure S2.** MicroSPECT/CT imaging of N87 xenograft-bearing mice injected with 18.5 MBq (0.1 mg/mouse) of [ $^{123}\text{I}$ ]labeled trastuzumab and 61 IgG at 12 and 36 hr p.i..
